RESEARCH ARTICLE

# A Validation Study of a Smartphone-Based Finger Tapping Application for Quantitative Assessment of Bradykinesia in Parkinson's Disease

Chae Young Lee<sup>1</sup>, Seong Jun Kang<sup>2</sup>, Sang-Kyoon Hong<sup>3</sup>, Hyeo-II Ma<sup>1</sup>\*, Unjoo Lee<sup>2</sup>\*, Yun Joong Kim<sup>1,3,4</sup>\*

**1** Department of Neurology, Hallym University Sacred Heart hospital, Hallym University College of Medicine, Hallym University, Anyang, Korea, **2** Department of Electronic Engineering, Hallym University, Chuncheon, Korea, **3** Hallym Institute of Translational Genomics & Bioinformatics, Hallym University Medical Center, Anyang, Korea, **4** ILSONG Institute of Life Science, Hallym University, Anyang, Korea

\* These authors contributed equally to this work.

\* [hima@hallym.ac.kr](mailto:hima@hallym.ac.kr) (HIM); [ejlee@hallym.ac.kr](mailto:ejlee@hallym.ac.kr) (UL); [yunkim@hallym.ac.kr](mailto:yunkim@hallym.ac.kr) (YJK)

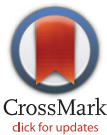

**OPEN ACCESS**

**Citation:** Lee CY, Kang SJ, Hong S-K, Ma H-I, Lee U, Kim YJ (2016) A Validation Study of a Smartphone-Based Finger Tapping Application for Quantitative Assessment of Bradykinesia in Parkinson's Disease. PLoS ONE 11(7): e0158852. doi:10.1371/journal.pone.0158852

**Editor:** Mikhail A. Lebedev, Duke University, UNITED STATES

**Received:** February 20, 2016

**Accepted:** May 23, 2016

**Published:** July 28, 2016

**Copyright:** © 2016 Lee et al. This is an open access article distributed under the terms of the [Creative Commons Attribution License](https://creativecommons.org/licenses/by/4.0/), which permits unrestricted use, distribution, and reproduction in any medium, provided the original author and source are credited.

**Data Availability Statement:** The application is available through GitHub: <https://github.com/unjoo/neurorehab/tree/HLTapper>.

**Funding:** The authors except YJK received no specific funding for this work. This research was supported by basic Science Research Program through the National Research Foundation of Korea (NRF) funded by the Ministry of Education, Science and Technology (NRF-2-1-0011158) to YJK. The funder had no role in study design, data collection and analysis, decision to publish, or preparation of the manuscript.

## Abstract

### Background

Most studies of smartphone-based assessments of motor symptoms in Parkinson's disease (PD) focused on gait, tremor or speech. Studies evaluating bradykinesia using wearable sensors are limited by a small cohort size and study design. We developed an application named smartphone tapper (SmT) to determine its applicability for clinical purposes and compared SmT parameters to current standard methods in a larger cohort.

### Methods

A total of 57 PD patients and 87 controls examined with motor UPDRS underwent timed tapping tests (TT) using SmT and mechanical tappers (MeT) according to CAPSIT-PD. Subjects were asked to alternately tap each side of two rectangles with an index finger at maximum speed for ten seconds. Kinematic measurements were compared between the two groups.

### Results

The mean number of correct tapping (MCoT), mean total distance of finger movement (T-Dist), mean inter-tap distance, and mean inter-tap dwelling time (IT-DwT) were significantly different between PD patients and controls. MCoT, as assessed using SmT, significantly correlated with motor UPDRS scores, bradykinesia subscores and MCoT using MeT. Multivariate analysis using the SmT parameters, such as T-Dist or IT-DwT, as predictive variables and age and gender as covariates demonstrated that PD patients were discriminated from controls. ROC curve analysis of a regression model demonstrated that the AUC for T-Dist was 0.92 (95% CI 0.88–0.96).

**Competing Interests:** The authors have declared that no competing interests exist.

## Conclusion

Our results suggest that a smartphone tapping application is comparable to conventional methods for the assessment of motor dysfunction in PD and may be useful in clinical practice.

## Introduction

Bradykinesia is a core feature that is essential in the clinical diagnosis of Parkinson's disease (PD). The motor section of the Unified Parkinson's Disease Rating Scale (motor UPDRS) and its subscores are the current gold standard for the assessment of motor dysfunction in PD. Motor UPDRS is an established method, but inter- and intra-rater reliability are only acceptable in well-trained persons. The timed tapping test using mechanical tappers in the Core assessment program for surgical interventional therapies in Parkinson's disease (CAPSIT-PD) protocol [1] is an objective method for the evaluation of bradykinesia, but no mechanical tapper instrument is widely used in routine clinical practice. Methods to evaluate tremor, bradykinesia, voice change, postural instability, and gait disturbance in PD were introduced with the development of sensor technologies using the accelerometer in custom-grade smartphone or wearable sensors (S1 Table) [2–22]. Most of these studies assessed gait disturbance or tremor, and few studies performed smartphone-based assessments of bradykinesia [2–11]. Studies using wearable sensors to assess bradykinesia have the following limitations: study design with a PD group only; the primary aim focused on technical points of view rather than clinical applicability; and a small number of study participants with factors that affected tapping speed were neglected.

We developed a smartphone application for a timed finger-tapping test (SmT) to determine the applicability of SmT for clinical purposes. SmT parameters were compared between PD cases and controls, and correlation analyses of parameters with current gold standard methods were performed. We also explored whether PD could be discriminated from controls using SmT parameters.

## Subjects and Methods

### Subjects

The Institutional Review Board of the Hallym University Sacred Heart Hospital approved this study. Participants were signed on a written informed consent which was approved by the same IRB. A total of 87 controls and 57 patients with PD were recruited. PD was diagnosed using the criteria based on the UK brain bank [23]. Healthy controls lacked Parkinsonism, thyroid disease, cerebrovascular diseases, or essential tremor on neurological examinations and history taking. Patients with cognitive impairment were excluded. All patients except for 6 drug-naïve patients were tested under medication. A total of 10 patients were reported to have ON-OFF stages. All of these patients were tested in an ON stage. Demographic information, including handedness, were collected for all of the subjects. Handedness was determined using the Edinburgh handedness inventory [24]. Clinical information for the PD group, including motor severity as evaluated using the motor UPDRS, was collected according to the standardized protocol. Table 1 summarizes the demographic data of the PD and control groups.

**Table 1. Demographic profile of patients with idiopathic Parkinson's disease and controls.**

|                                  | PD              | Controls    | P values |
|----------------------------------|-----------------|-------------|----------|
| Number of subjects, n            | 57              | 87          | -        |
| Age-at-study, years (SD)         | 65.4 (9.0)      | 53.4 (14.8) | <0.01    |
| Gender, male %                   | 59.6            | 39.1        | <0.05    |
| Handedness, right/left/bilateral | 53/0/4          | 84/3/0      | <0.01    |
| PD duration, months (SD)         | 58.0 (45.1)     | -           | -        |
| Medication status                |                 | -           | -        |
| levodopa naïve, n                | 6               | -           | -        |
| On dopaminergic medication, n    | 51              | -           | -        |
| LEDD ranges, mg                  | 100–1600        | -           | -        |
| LEDD mean (SD), mg               | 622.09 (365.71) | -           | -        |
| Hoehn & Yahr stages (1/2/2.5/3)  | 3/24/16/14      | -           | -        |
| Motor UPDRS scores, mean         | 20.0 (10.6)     | -           | -        |

PD, idiopathic Parkinson's disease, LEDD, levodopa equivalent dose (Tomlinson, C.L., et al., *Mov Disord*, 2010. 25(15): p. 2649–53.), motor UPDRS, unified Parkinson's disease rating scale.

doi:10.1371/journal.pone.0158852.t001

### Timed tapping test using mechanical tappers

Timed tapping tests using a mechanical tapper were performed according to the CAPSIT-PD protocol [1]. Briefly, two mechanical finger tappers (WW-1597-NP, PAR Inc. Lutz, USA) were fixed on 250 X 450 square millimeter board separated by 300 millimeters. Tapping on one tapper (MeT1) was performed for 10 seconds, and the alternative tapping of two tappers (MeT2) was performed for 20 seconds. Each trial of MeT1 and MeT2 was repeated three times at maximal speed.

### Timed tapping test using a smartphone tapper

Two authors (S.J.K. and U.L.) developed a smartphone application for the timed tapping test and installed the application in LG Optimus G smartphones with Android OS. This application is available at the following link: <https://sites.google.com/site/neurorehabict/downloads/ftapp>. This application consists of two rectangles of 30 by 45 millimeters, separated by 15 millimeters (S1 Fig). Smartphone timed tapping test subjects were asked to alternately tap each side of the rectangles using an index finger at their fastest speed for ten seconds. The same tapping tasks were repeated three times for each hand. The results of the tests, including the number of trials, screen pixel position of each tap (X, Y coordinates), time of each tap, and the number of taps per trial, were transferred to Google drive via the internet. Kinematic measurements, such as inter-tap distance, inter-tap dwelling time (time lapse between two consecutive taps), total distance of a finger movement and tapping speed of each movement of a finger, were calculated from the recorded parameters. Briefly, inter-tap distance, which refers to the distance between two consecutive tap positions on the screen, was calculated using Pythagoras' theorem. The total distance of a finger movement was calculated indirectly by summation of all inter-tap distances in each tapping task. Tapping errors (tapping outside of squares) were determined using the position of each tap. Mean and median values of parameters in three trials were used to analyze the data.

### Statistical analyses

The means of all continuous variables between PD and control groups were compared using an independent t-test or Mann-Whitney U test. Analyses were conducted for the better hand, the

worse hand and the average scores of both hands. The better hand and the worse hand were assigned based on the following rules. The dominant hand in controls was assigned as the better hand, and the non-dominant hand was the worse hand. The better or worse hand in PD patients was determined based on motor UPDRS score regardless of handedness. The hand with the higher mean number of taps was assigned as the better hand in cases with clinically symmetric motor signs. The asymmetry index of a parameter was calculated as follows: asymmetry index =  $100 \times (\text{better-worse}) / (\text{better} + \text{worse})$ . T-tests were used for comparisons of means between groups. Univariate analyses were conducted to determine the effects of sex, age, and hand dominance on the number of taps. Linear regression analysis was used to determine the relationship between the number of taps obtained using the smartphone tapper and motor UPDRS scores or the mean number of taps obtained using the mechanical tapper. Receiver operating (ROC) curve analyses were performed to investigate the utility of any of the above parameters in discriminating PD patients from controls. A  $p < 0.05$  was considered statistically significant in all tests except for a multiple comparison of parameters obtained from smartphone tappers or mechanical tappers between PD and controls (Table 2), where a Bonferroni corrected  $p$  value of  $< 0.00139$  was considered significant. All statistical analyses were performed using R (version 3.2.4, Graduate School of Public Health, Seoul National University, Seoul, Korea, <http://healthstat.snu.ac.kr/CRAN/>).

## Results

Table 2 summarizes the comparisons of the parameter means from MeT and SmT. Analyses of the parameters from the correct taps within the rectangles revealed that the mean number of taps was smaller, the total distance of finger movement and the inter-tap distance were shorter, and the inter-tap dwelling time was longer in the PD patients compared to the controls ( $p < 0.00139$ ). On the other hand, the analyses of the parameters from the tap errors revealed that only the mean dwelling time was significantly different between the two groups ( $p \leq 0.0001$ ). The asymmetry indices were not significantly different in all the parameters: number of correct tap, total distance of finger movements, inter-tap distance of correct tap and inter-tap dwelling time of correct tap.

The number of taps using SmT highly correlated with mechanical tappers in PD and control groups regardless of hand laterality ( $R^2$  from 0.19 to 0.57, S2 Table). Notably, the correlation of tapping numbers using SmT was higher with the 2-points tapping task compared to the 1-point tapping task in control mechanical tappers. However, the degree of correlation in the number of taps in the PD group was similar between SmT and both tasks using mechanical tappers (MeT1 and MeT2). Table 3 summarizes the results of linear regression between the median number of taps using a smartphone tapper or mechanical tappers and the score or subscores of motor UPDRS, which is the gold standard method for the evaluation of motor severity of PD. The median number of taps in three trials of SmT, MeT1 and MeT2 significantly correlated with motor UPDRS scores. The correlation of the median number of taps from SmT with bradykinesia was the highest of the motor UPDRS subscores, but there was no correlation with the tremor subscore. A sub-analysis to correlate between the motor UPDRS score of each side of the limbs and the median number of taps from the ipsilateral or contralateral hand was performed (S3 Table). The bradykinesia subscore of the right limbs correlated better with the median tap number of the right hand than that of the left hand. However, the degree of correlation between the bradykinesia subscore of the left limbs were similar in both sides. The unilateral tremor scores did not correlate with the ipsilateral or contralateral timed tapping test results. The unilateral tremor score also did not correlate with the total number of tap error or

**Table 2. Comparison of parameters obtained from mechanical tappers and smartphone tappers between idiopathic Parkinson's disease and controls.**

| Parameters (units)                           |                                             | hand                                         | PD            | Control           | p value*          |                   |                   |
|----------------------------------------------|---------------------------------------------|----------------------------------------------|---------------|-------------------|-------------------|-------------------|-------------------|
| Mechanical tapper                            | No. of taps in one-point tapping            | Average                                      | 19.5 (4.5)    | 28.0 (5.2)        | <b>&lt;0.0001</b> |                   |                   |
|                                              |                                             | Better                                       | 20.7 (4.8)    | 29.4 (5.8)        | <b>&lt;0.0001</b> |                   |                   |
|                                              |                                             | Worse                                        | 18.4 (4.5)    | 26.6 (4.9)        | <b>&lt;0.0001</b> |                   |                   |
|                                              | No. of taps in two-points tapping           | Average                                      | 47.8 (12.1)   | 55.8 (10.8)       | <b>&lt;0.0001</b> |                   |                   |
|                                              |                                             | Better                                       | 49.5 (12.5)   | 58.4 (11.0)       | <b>0.001</b>      |                   |                   |
|                                              |                                             | Worse                                        | 45.8 (12.4)   | 53.2 (11.7)       | <b>&lt;0.0001</b> |                   |                   |
| Smart-phone tapper                           | No. of correct taps                         | mean                                         |               | Average           | 40.54 (7.92)      | 54.50 (11.53)     | <b>&lt;0.0001</b> |
|                                              |                                             |                                              |               | Better            | 42.62 (8.98)      | 58.70 (13.26)     | <b>&lt;0.0001</b> |
|                                              |                                             |                                              |               | Worse             | 38.46 (8.12)      | 50.29 (10.65)     | <b>&lt;0.0001</b> |
|                                              |                                             | Variance in three trials                     |               | Better            | 11.61 (37.70)     | 17.89 (41.07)     | 0.356             |
|                                              |                                             |                                              |               | Worse             | 4.66 (6.03)       | 15.93 (33.75)     | 0.003             |
|                                              |                                             | AI                                           |               | Mean              | 0.06 (0.07)       | 0.07 (0.07)       | 0.488             |
|                                              | No. of tap error                            | Total number of tap error in 3 trials        | Both          | 2.02 (3.75)       | 2.99 (4.45)       | 0.176             |                   |
|                                              |                                             |                                              | Better        | 4.51 (6.43)       | 5.87 (6.66)       | 0.504             |                   |
|                                              |                                             |                                              | Worse         | 2.49 (3.38)       | 2.89 (3.50)       | 0.225             |                   |
|                                              |                                             | Mean number of tap error in each trial       | Average       | 0.75 (1.1)        | 1.0 (1.1)         | 0.176             |                   |
|                                              |                                             |                                              | Better        | 0.67 (1.2)        | 1.0 (1.5)         | 0.504             |                   |
|                                              |                                             |                                              | Worse         | 0.83 (1.1)        | 1.0 (1.2)         | 0.225             |                   |
|                                              |                                             | Variance of tap error in 3 trials            | Average       | 1.4 (3.4)         | 1.8 (3.5)         | 0.666             |                   |
|                                              |                                             |                                              | Better        | 1.3 (4.5)         | 1.6 (3.9)         | 0.956             |                   |
|                                              |                                             |                                              | Worse         | 1.4 (3.7)         | 1.3 (2.3)         | 0.457             |                   |
|                                              |                                             | Total distance of finger movement, mean (mm) | Average       | 807.60 (193.72)   | 1330.63 (341.11)  | <b>&lt;0.0001</b> |                   |
|                                              |                                             |                                              | Better        | 837.77 (210.26)   | 1423.98 (378.89)  | <b>&lt;0.0001</b> |                   |
|                                              |                                             |                                              | Worse         | 777.42 (194.63)   | 1237.28 (319.64)  | <b>&lt;0.0001</b> |                   |
|                                              | AI                                          |                                              | 0.03 (0.07)   | 0.06 (0.06)       | <0.05             |                   |                   |
|                                              | Inter-tap distance of correct taps, mean    | Average                                      | 19.77 (2.43)  | 23.51 (3.06)      | <b>&lt;0.0001</b> |                   |                   |
|                                              |                                             | Better                                       | 20.02 (3.06)  | 24.05 (3.65)      | <b>&lt;0.0001</b> |                   |                   |
|                                              |                                             | Worse                                        | 19.53 (2.65)  | 22.97 (3.16)      | <b>&lt;0.0001</b> |                   |                   |
|                                              |                                             | AI                                           | -0.01 (0.08)  | 0.02 (0.06)       | <0.05             |                   |                   |
|                                              | Inter-tap distance of tap errors, mean (mm) | Better                                       | 25.32 (14.51) | 34.85 (17.40)     | 0.0030            |                   |                   |
| Worse                                        |                                             | 27.03 (15.66)                                | 33.99 (18.64) | 0.0459            |                   |                   |                   |
| Dwelling time in correct tap, mean (seconds) | Average                                     | 0.25 (0.06)                                  | 0.19 (0.05)   | <b>&lt;0.0001</b> |                   |                   |                   |
|                                              | Better                                      | 0.24 (0.05)                                  | 0.17 (0.05)   | <b>&lt;0.0001</b> |                   |                   |                   |
|                                              | Worse                                       | 0.26 (0.06)                                  | 0.20 (0.05)   | <b>&lt;0.0001</b> |                   |                   |                   |
|                                              | AI                                          | -0.05 (0.07)                                 | -0.08 (0.06)  | <0.05             |                   |                   |                   |
| Dwelling time in tap errors, mean (seconds)  | Better                                      | 0.33(0.07)                                   | 0.23 (0.08)   | <b>&lt;0.0001</b> |                   |                   |                   |
|                                              | Worse                                       | 0.33 (0.07)                                  | 0.26 (0.10)   | <b>0.0001</b>     |                   |                   |                   |

Values are means and standard deviation in parenthesis. PD, idiopathic Parkinson's disease; Average, average of both hands; Better, the better hand; Worse, the worse hand; Both, sum of both hands. AI, asymmetry index.

\* T-test or Mann-Whitney U test. A Bonferroni corrected p value <0.00139, which is marked in bold, was considered statistically significant.

doi:10.1371/journal.pone.0158852.t002

variance of numbers of taps on the ipsilateral side. The means of the number of taps exhibited similar results.

We determined the factors that affected the number of smartphone taps. Males and younger control group subjects exhibited higher numbers of smartphone taps (S4 and S5 Tables). Univariate analysis in the PD group revealed that PD duration, Hoehn & Yahr stage, and motor

**Table 3. Results of linear regression between number of taps in three different timed tapping tests using a mechanical or smartphone tapper and motor scores of Unified Parkinson's disease rating scale or its subscores in idiopathic Parkinson's disease.**

|                                                                   |       | Average  |      |                |          | Better hand |      |                |          | Worse hand |      |                |          |
|-------------------------------------------------------------------|-------|----------|------|----------------|----------|-------------|------|----------------|----------|------------|------|----------------|----------|
|                                                                   |       | Estimate | SE   | R <sup>2</sup> | p value  | Estimate    | SE   | R <sup>2</sup> | p value  | Estimate   | SE   | R <sup>2</sup> | p value  |
| motor UPDRS scores                                                | MeT1P | -0.52    | 0.14 | 0.21           | 0.0004   | -0.57       | 0.14 | 0.24           | 0.0002   | -0.45      | 0.15 | 0.15           | 0.0030   |
|                                                                   | MeT2P | -0.21    | 0.05 | 0.25           | < 0.0001 | -0.22       | 0.05 | 0.24           | 0.0001   | -0.21      | 0.05 | 0.24           | 0.0001   |
|                                                                   | SmT   | -0.37    | 0.09 | 0.25           | < 0.0001 | -0.43       | 0.10 | 0.27           | < 0.0001 | -0.29      | 0.10 | 0.14           | 0.0049   |
| bradykinesia subscore of motor UPDRS                              | MeT1P | -1.05    | 0.24 | 0.26           | < 0.0001 | -1.17       | 0.24 | 0.31           | < 0.0001 | -0.93      | 0.25 | 0.20           | 0.0005   |
|                                                                   | MeT2P | -0.41    | 0.09 | 0.29           | < 0.0001 | -0.43       | 0.09 | 0.27           | < 0.0001 | -0.40      | 0.09 | 0.29           | < 0.0001 |
|                                                                   | SmT   | -0.75    | 0.15 | 0.32           | < 0.0001 | -0.88       | 0.16 | 0.36           | < 0.0001 | -0.58      | 0.17 | 0.17           | 0.0013   |
| rigidity subscore of motor UPDRS                                  | MeT1P | -1.17    | 0.62 | 0.06           | 0.0657   | -1.19       | 0.65 | 0.06           | 0.0739   | -0.85      | 0.65 | 0.03           | 0.1967   |
|                                                                   | MeT2P | -0.57    | 0.23 | 0.10           | 0.0152   | -0.57       | 0.25 | 0.09           | 0.0243   | -0.55      | 0.23 | 0.10           | 0.0175   |
|                                                                   | SmT   | -0.71    | 0.41 | 0.05           | 0.0895   | -0.90       | 0.45 | 0.07           | 0.0503   | -0.42      | 0.44 | 0.02           | 0.3448   |
| tremor subscore of motor UPDRS                                    | MeT1P | 0.62     | 0.80 | 0.01           | 0.4417   | 0.82        | 0.83 | 0.02           | 0.3275   | 0.62       | 0.82 | 0.01           | 0.4530   |
|                                                                   | MeT2P | -0.02    | 0.30 | 0.00           | 0.9423   | -0.05       | 0.32 | 0.00           | 0.8712   | -0.02      | 0.30 | 0.00           | 0.9493   |
|                                                                   | SmT   | 0.03     | 0.52 | 0.00           | 0.9544   | 0.24        | 0.58 | 0.00           | 0.6798   | 0.17       | 0.55 | 0.00           | 0.7629   |
| postural instability and gait disturbance subscore of motor UPDRS | MeT1P | -2.05    | 0.57 | 0.19           | 0.0006   | -2.27       | 0.58 | 0.22           | 0.0003   | -1.95      | 0.59 | 0.17           | 0.0016   |
|                                                                   | MeT2P | -0.74    | 0.21 | 0.18           | 0.0010   | -0.77       | 0.23 | 0.17           | 0.0016   | -0.74      | 0.21 | 0.19           | 0.0008   |
|                                                                   | SmT   | -1.18    | 0.38 | 0.15           | 0.0031   | -1.32       | 0.42 | 0.15           | 0.0028   | -1.11      | 0.41 | 0.12           | 0.0086   |

MeT1P, one-point tap measure of a mechanical tapper; MeT2P, two-points tap measure of a mechanical tapper; SmT, smartphone tapper.

doi:10.1371/journal.pone.0158852.t003

UPDRS score negatively correlated with the number of smartphone taps. However, multivariate analysis demonstrated that only motor UPDRS scores correlated negatively with the number of smartphone taps (S6 Table). Multivariate analyses were performed using the diagnosis of PD or control as the response variable, parameters obtained from smartphone tappers as predictive variables, and age and sex as covariates to investigate whether parameters derived from smartphone tappers could discriminate PD patients from controls. The mean number of correct taps, variance of tapping number in the worse hand, total distance of finger movements, inter-tap distance of correct taps, inter-tap distance of tap errors in the better hand, and inter-tap dwelling time discriminated PD patients from controls (Table 4).

We performed ROC curve analyses using a logistic regression model where diagnosis was set as a response variable, the mean of total distance or inter-tap dwelling time were predictive variables, and age and gender were covariates. ROC analyses using 2000 non-stratified bootstrap sampling demonstrated that the AUC for dwelling time was 0.88 (95% CI 0.82–0.93), and the AUC for the total distance of finger movements was 0.92 (95% CI 0.88–0.96) (Fig 1).

## Discussion

Our results demonstrated that the SmT parameters of slowness and smaller amplitude of finger tapping movements reflected the characteristics of bradykinesia of PD. The asymmetry indices related with the tapping speed and distance were not different between the PD and control groups because of our stringent p value threshold. The number of taps using SmT highly correlated with mUPDRS and its bradykinesia subscore. Several kinematic measurement devices using a smartphone application or a wearable sensor to capture characteristics of motor dysfunction in PD have been developed (S1 Table) [2–10, 12–21, 25]. Most kinematic studies using smartphones assessed gait disturbance or tremor rather than bradykinesia [3–7, 9, 10]. Wearable sensors or non-wearable devices are generally adopted for analyses of bradykinesia, and studies using smartphones are few [3, 9, 12, 14, 15, 21, 25, 26]. Studies using these devices

**Table 4. Results of multivariate analyses to determine smartphone tapper parameters discriminating idiopathic Parkinson's disease from controls.** Age and gender were used as covariates in each analysis.

| Parameters                               |                      | laterality | Estimate | SE      | p value |
|------------------------------------------|----------------------|------------|----------|---------|---------|
| No. of correct taps                      | Mean                 | Average    | -0.15    | 0.03    | <0.0001 |
|                                          |                      | Better     | -0.13    | 0.03    | <0.0001 |
|                                          |                      | Worse      | -0.13    | 0.03    | <0.0001 |
|                                          | Variance in 3 trials | Better     | -0.01    | 0.01    | 0.3100  |
|                                          |                      | Worse      | -0.06    | 0.02    | 0.0113  |
|                                          | Asymmetry index      | mean       | -0.68    | 2.77    | 0.8044  |
| No. of tap errors                        | total number         | Both       | -0.06    | 0.03    | 0.0672  |
|                                          |                      | Better     | -0.05    | 0.05    | 0.3383  |
|                                          |                      | Worse      | -0.08    | 0.06    | 0.1779  |
|                                          | Variance in 3 trials | Both       | -0.08    | 0.06    | 0.2152  |
|                                          |                      | Better     | -0.05    | 0.05    | 0.3383  |
|                                          |                      | Worse      | -0.03    | 0.07    | 0.6570  |
| Total distance of finger movement, mean  | Average              | 0.00       | 0.00     | <0.0001 |         |
|                                          | Better               | 0.00       | 0.00     | <0.0001 |         |
|                                          | Worse                | 0.00       | 0.00     | <0.0001 |         |
|                                          | Asymmetry index      | -5.71      | 2.94     | 0.5216  |         |
| Inter-tap distance of correct taps, mean | Average              | -0.02      | 0.00     | <0.0001 |         |
|                                          | Better               | -0.02      | 0.00     | <0.0001 |         |
|                                          | Worse                | -0.02      | 0.00     | <0.0001 |         |
|                                          | Asymmetry index      | -5.97      | 2.92     | 0.0412  |         |
| Inter-tap distance of tap errors, mean   | Better               | 0.00       | 0.00     | 0.0059  |         |
|                                          | Worse                | 0.00       | 0.00     | 0.2504  |         |
| Dwelling time of correct taps, mean      | Average              | 24.31      | 5.71     | <0.0001 |         |
|                                          | Better               | 24.65      | 5.68     | <0.0001 |         |
|                                          | Worse                | 19.21      | 4.74     | 0.0001  |         |
|                                          | Asymmetry index      | 6.10       | 3.29     | 0.0637  |         |
| Dwelling time of tap errors, mean        | Better               | 17.84      | 4.62     | 0.0001  |         |
|                                          | Worse                | 6.07       | 2.80     | 0.0304  |         |

Average, average of both hands; Better, the better hand; Worse, the worse hand; Both, sum of both hands

doi:10.1371/journal.pone.0158852.t004

suffer the following limitations for clinical applicability. The studies are also limited by their focus on the technical aspects of the device rather than the clinical application [10, 16, 19]. The number of participants is also small, and extensive analyses of kinematic parameters in controls, which are affected by age, sex and handedness, are lacking [3, 9, 12, 13, 16, 18, 19, 21, 22, 26]. Our study is the largest cohort of PD patients and controls to focus on the applicability of a smartphone application for the assessment of bradykinesia. Noyce et al. [25] reported a well-designed study to assess bradykinesia in PD patients using a computer keyboard, which reflected characteristic features of bradykinesia. Our study of SmT has advantages over this previous study because the total distance of finger movements and inter-tap distance, which reflect characteristic smaller amplitude movements in PD patients, were measured. Another important advantage of a smartphone application compared to a wearable sensor or computer keyboard is its easy availability, operability and mobility for patients and health care providers, which renders it more suitable for a large-scale field study.

Previous smartphone tapping tasks [3, 9] used an alternative tapping test using two fingers (index and middle finger) or a one-point finger tapping test using the index finger. In contrast,

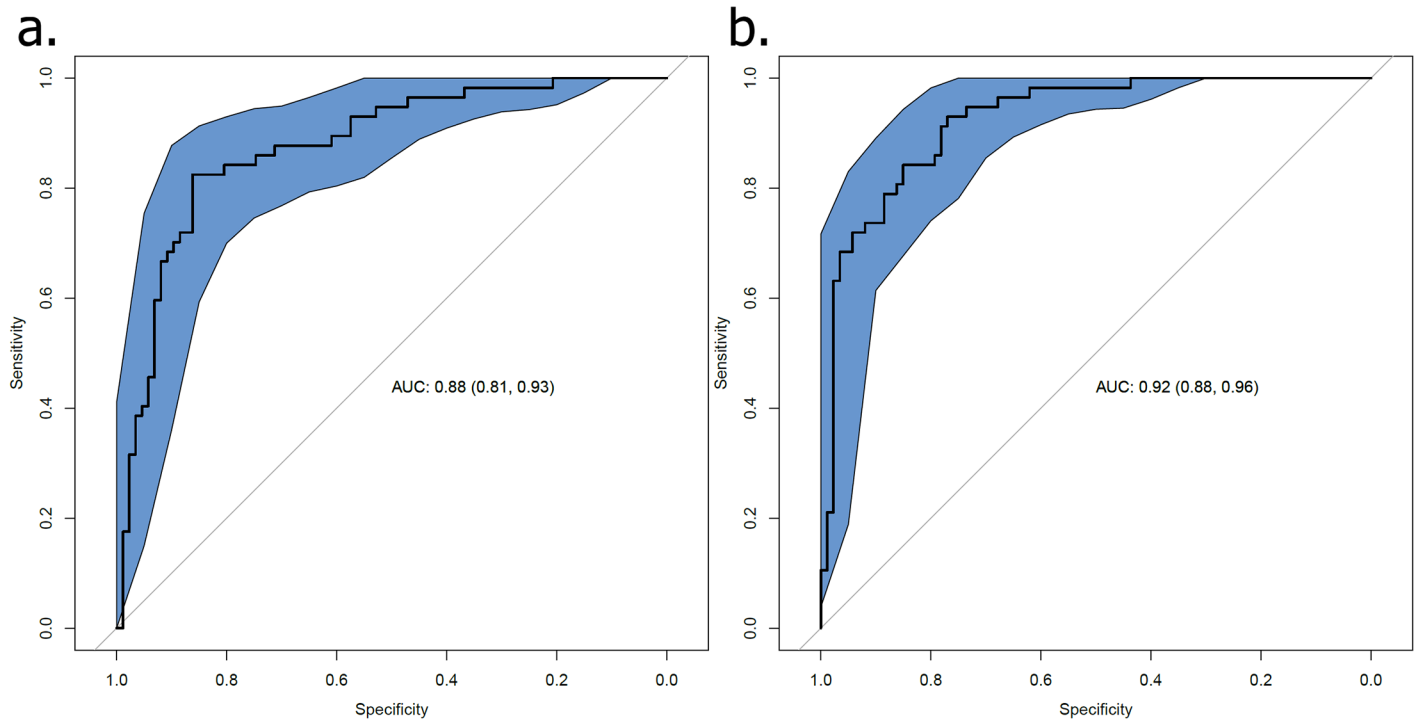

**Fig 1. ROC curve analyses of multiple regression models to predict idiopathic Parkinson's disease or control.** Dwelling time (a) or total distance averaged for both sides (b) were predictive variables, and age and gender were used as covariates. Shaded areas represent 95% confidence intervals, which are indicated in parentheses.

doi:10.1371/journal.pone.0158852.g001

our finger tapping task with SmT was a two-points finger tapping test using one index finger. Notably, tapping numbers of SmT correlated better with the two-points tapping task using a mechanical tapper in controls despite the 20-fold difference in distance of the two tapping targets between SmT and mechanical tappers. However, we did not observe this different degree of correlation between the one-point and two-points tapping tests in PD, likely because of a floor effect. The correlation of tapping number using SmT with the bradykinesia subscore, but not the tremor subscore of mUPDRS supports the applicability of SmT in clinical practice. However, considering that the disease severity of our IPD patients was mild and moderate, a possible negative effect of tremor on an accurate measurement of the SmT tap number might have been under-estimated. Two small-scale pilot studies revealed the possibility of discriminating PD patients from controls using a machine-learning algorithm on smartphone-based measurements of motor function [3, 10]. We did not adopt a machine-learning algorithm, but we could explore whether SmT parameters could discriminate PD patients from controls in a larger data set of SmT parameters from cases and controls. The high AUC for total distance of finger movement in ROC curve analyses using a regression model suggests that SmT is an applicable screening test for PD. Additional parameters that are independent of the speed and distance of finger taps measured by SmT should be included. Alternatively, our SmT may provide additional parameters to the current smartphone-based gait or speech measurements to discriminate PD patients from controls. There are limitations in our study. Unfortunately, we failed to find parameters that reflected fatigue (decrement response) and hesitation (inter-tap irregularity), which are characteristics of motor dysfunction in PD. A recent pilot study by Arora analyzed hastening, faltering or freezing in the tapping patterns (arrhythmokinesia) of a smartphone-based finger tapping tasks using two fingers, but the parameters of these analyses



were not described in detail [3]. Total and median numbers of tap errors and variance, which we expected to reflect irregularity, were not different between two groups. Hesitation may have been incorporated in increased inter-tap dwelling time in SmT. Precise definitions of fatigue and hesitation in finger tapping tests in clinical settings may be needed to identify the parameters that reflect these parameters in SmT. Drug-naïve PD patients in early stages were only 10.5% of the population in our study, and differences of SmT parameters in de novo PD patients may be smaller than the differences in our data. Our study does not consider the possible effect of anti-parkinsonian medication on the tapping score, which may or may not be affected. Kraus et al (2005) demonstrated that plugging scores of a pegboard test, but not fast tapping scores, tracked changes that paralleled decrements in clinical scores. Plugging scores varied with the action of dopaminergic therapy, whereas a tapping score showed no therapeutic response [27]. Our study cannot be directly compared to this study because the SmT has several parameters other than the number of taps, and we did not include a pegboard test as a reference gold standard method. Whether SmT is applicable in determining levodopa responsiveness or monitoring the progression of motor dysfunction in PD should be explored in future studies. The attention function, which affects finger tapping speed, was not systemically evaluated or included in our analyses. The patient cohort was not well matched for age or gender, although both were adjusted in the multivariate analysis by including them as covariates.

In conclusion, our smartphone tapping application was comparable to conventional methods for the assessment of bradykinesia in PD, and this application may be useful in clinical practice or field studies.

## Supporting Information

**S1 Fig. The interface of a smartphone tapper used in this study.**

(TIF)

**S1 Table. Summary of smartphone application, non-wearable device and wearable sensors previously published in literatures.**

(DOCX)

**S2 Table. Results of linear regression between numbers of taps using two different methods of a mechanical tapper and smartphone tapper in idiopathic Parkinson's disease and controls.**

(DOCX)

**S3 Table. Results of linear regression between number of taps in three different timed tapping tests using a mechanical or smartphone tapper and limb's item sum of motor scores of Unified Parkinson's disease rating scale in idiopathic Parkinson's disease.**

(DOCX)

**S4 Table. Differences in number of taps in the smartphone tapper test according to sex in normal controls.**

(DOCX)

**S5 Table. Changes in number of taps in the smartphone tapper test according to age in normal controls.**

(DOCX)

**S6 Table. Factors affecting tap number in smartphone tapper test in patients with idiopathic Parkinson's disease.**

(DOCX)

## Acknowledgments

Authors would like to thank Ms. Na-Young Son and Dr. Jin-Hyuck Kim for their help in organizing data and drafting a manuscript, and Jenna Lipson for her help in English editing. This research was supported by basic Science Research Program through the National Research Foundation of Korea (NRF) funded by the Ministry of Education, Science and Technology (NRF-2014R1A1A4A01007783). This research was supported by the Hallym University Research Fund (HURF-2015-34). The funders had no role in study design, data collection and analysis, decision to publish, or preparation of the manuscript.

## Author Contributions

Conceived and designed the experiments: YJK. Performed the experiments: CYL HIM. Analyzed the data: SKH YJK. Contributed reagents/materials/analysis tools: SJK UL. Wrote the paper: CYL YJK. Critical review of manuscript: UL HIM.

## References

1. Defer GL, Widner H, Marie RM, Remy P, Levivier M. Core assessment program for surgical interventional therapies in Parkinson's disease (CAPSIT-PD). *Mov Disord*. 1999; 14:572–84. PMID: [10435493](#)
2. Antos SA, Albert MV, Kording KP. Hand, belt, pocket or bag: Practical activity tracking with mobile phones. *J Neurosci Methods*. 2014; 231:22–30. doi: [10.1016/j.jneumeth.2013.09.015](#) PMID: [24091138](#)
3. Arora S, Venkataraman V, Zhan A, Donohue S, Biglan KM, Dorsey ER, et al. Detecting and monitoring the symptoms of Parkinson's disease using smartphones: A pilot study. *Parkinsonism Relat Disord*. 2015; 21:650–3. doi: [10.1016/j.parkreldis.2015.02.026](#) PMID: [25819808](#)
4. Carignan B, Daneault JF, Duval C. Measuring tremor with a smartphone. *Methods Mol Biol*. 2015; 1256:359–74. doi: [10.1007/978-1-4939-2172-0\\_24](#) PMID: [25626551](#)
5. Ellis RJ, Ng YS, Zhu S, Tan DM, Anderson B, Schlaug G, et al. A Validated Smartphone-Based Assessment of Gait and Gait Variability in Parkinson's Disease. *PLoS One*. 2015; 10:e0141694. doi: [10.1371/journal.pone.0141694](#) PMID: [26517720](#)
6. LeMoyné R, Mastroianni T. Use of smartphones and portable media devices for quantifying human movement characteristics of gait, tendon reflex response, and Parkinson's disease hand tremor. *Methods Mol Biol*. 2015; 1256:335–58. doi: [10.1007/978-1-4939-2172-0\\_23](#) PMID: [25626550](#)
7. Palmerini L, Mellone S, Rocchi L, Chiari L. Dimensionality reduction for the quantitative evaluation of a smartphone-based Timed Up and Go test. *Conf Proc IEEE Eng Med Biol Soc*. 2011; 2011:7179–82. doi: [10.1109/IEMBS.2011.6091814](#) PMID: [22255994](#)
8. Pan D, Dhall R, Lieberman A, Petitti DB. A mobile cloud-based Parkinson's disease assessment system for home-based monitoring. *JMIR Mhealth Uhealth*. 2015; 3:e29. doi: [10.2196/mhealth.3956](#) PMID: [25830687](#)
9. Printy BP, Renken LM, Herrmann JP, Lee I, Johnson B, Knight E, et al. Smartphone application for classification of motor impairment severity in Parkinson's disease. *Conf Proc IEEE Eng Med Biol Soc*. 2014; 2014:2686–9. doi: [10.1109/EMBC.2014.6944176](#) PMID: [25570544](#)
10. Raknim P, Lan KC. Gait Monitoring for Early Neurological Disorder Detection Using Sensors in a Smartphone: Validation and a Case Study of Parkinsonism. *Telemed J E Health*. 2015.
11. Kostikis N, Hristu-Varsakelis D, Arnaoutoglou M, Kotsavasiloglou C. A Smartphone-Based Tool for Assessing Parkinsonian Hand Tremor. *IEEE J Biomed Health Inform*. 2015; 19:1835–42. doi: [10.1109/JBHI.2015.2471093](#) PMID: [26302523](#)
12. Dai H, Lin H, Lueth TC. Quantitative assessment of parkinsonian bradykinesia based on an inertial measurement unit. *Biomed Eng Online*. 2015; 14:68. doi: [10.1186/s12938-015-0067-8](#) PMID: [26164814](#)
13. Dai H, Zhang P, Lueth TC. Quantitative Assessment of Parkinsonian Tremor Based on an Inertial Measurement Unit. *Sensors (Basel)*. 2015; 15:25055–71.
14. Heldman DA, Filipkowski DE, Riley DE, Whitney CM, Walter BL, Gunzler SA, et al. Automated motion sensor quantification of gait and lower extremity bradykinesia. *Conf Proc IEEE Eng Med Biol Soc*. 2012; 2012:1956–9. doi: [10.1109/EMBC.2012.6346338](#) PMID: [23366299](#)
15. Kim JW, Lee JH, Kwon Y, Kim CS, Eom GM, Koh SB, et al. Quantification of bradykinesia during clinical finger taps using a gyrosensor in patients with Parkinson's disease. *Med Biol Eng Comput*. 2011; 49:365–71. doi: [10.1007/s11517-010-0697-8](#) PMID: [21052856](#)

16. Patel S, Chen BR, Mancinelli C, Paganoni S, Shih L, Welsh M, et al. Longitudinal monitoring of patients with Parkinson's disease via wearable sensor technology in the home setting. *Conf Proc IEEE Eng Med Biol Soc.* 2011; 2011:1552–5. doi: [10.1109/IEMBS.2011.6090452](https://doi.org/10.1109/IEMBS.2011.6090452) PMID: [22254617](https://pubmed.ncbi.nlm.nih.gov/22254617/)
17. Roy SH, Cole BT, Gilmore LD, De Luca CJ, Nawab SH. Resolving signal complexities for ambulatory monitoring of motor function in Parkinson's disease. *Conf Proc IEEE Eng Med Biol Soc.* 2011; 2011:4836–9. doi: [10.1109/IEMBS.2011.6091198](https://doi.org/10.1109/IEMBS.2011.6091198) PMID: [22255421](https://pubmed.ncbi.nlm.nih.gov/22255421/)
18. Salarian A, Russmann H, Wider C, Burkhard PR, Vingerhoets FJ, Aminian K. Quantification of tremor and bradykinesia in Parkinson's disease using a novel ambulatory monitoring system. *IEEE Trans Biomed Eng.* 2007; 54:313–22. PMID: [17278588](https://pubmed.ncbi.nlm.nih.gov/17278588/)
19. Takac B, Catala A, Rodriguez Martin D, van der Aa N, Chen W, Rauterberg M. Position and orientation tracking in a ubiquitous monitoring system for Parkinson disease patients with freezing of gait symptom. *JMIR Mhealth Uhealth.* 2013; 1:e14. doi: [10.2196/mhealth.2539](https://doi.org/10.2196/mhealth.2539) PMID: [25098265](https://pubmed.ncbi.nlm.nih.gov/25098265/)
20. Wagner R, Ganz A. PAGAS: Portable and Accurate Gait Analysis System. *Conf Proc IEEE Eng Med Biol Soc.* 2012; 2012:280–3. doi: [10.1109/EMBC.2012.6345924](https://doi.org/10.1109/EMBC.2012.6345924) PMID: [23365885](https://pubmed.ncbi.nlm.nih.gov/23365885/)
21. Zwartjes DG, Heida T, van Vugt JP, Geelen JA, Veltink PH. Ambulatory monitoring of activities and motor symptoms in Parkinson's disease. *IEEE Trans Biomed Eng.* 2010; 57.
22. Roy SH, Cole BT, Gilmore LD, De Luca CJ, Thomas CA, Saint-Hilaire MM, et al. High-resolution tracking of motor disorders in Parkinson's disease during unconstrained activity. *Mov Disord.* 2013; 28:1080–7. doi: [10.1002/mds.25391](https://doi.org/10.1002/mds.25391) PMID: [23520058](https://pubmed.ncbi.nlm.nih.gov/23520058/)
23. Hughes AJ, Daniel SE, Kilford L, Lees AJ. Accuracy of clinical diagnosis of idiopathic Parkinson's disease: a clinico-pathological study of 100 cases. *J Neurol Neurosurg Psychiatry.* 1992; 55:181–4. PMID: [1564476](https://pubmed.ncbi.nlm.nih.gov/1564476/)
24. Oldfield RC. The assessment and analysis of handedness: the Edinburgh inventory. *Neuropsychologia.* 1971; 9:97–113. PMID: [5146491](https://pubmed.ncbi.nlm.nih.gov/5146491/)
25. Noyce AJ, Nagy A, Acharya S, Hadavi S, Bestwick JP, Fearnley J, et al. Bradykinesia-akinesia incoordination test: validating an online keyboard test of upper limb function. *PLoS One.* 2014; 9:e96260. doi: [10.1371/journal.pone.0096260](https://doi.org/10.1371/journal.pone.0096260) PMID: [24781810](https://pubmed.ncbi.nlm.nih.gov/24781810/)
26. Taylor Tavares AL, Jefferis GS, Koop M, Hill BC, Hastie T, Heit G, et al. Quantitative measurements of alternating finger tapping in Parkinson's disease correlate with UPDRS motor disability and reveal the improvement in fine motor control from medication and deep brain stimulation. *Mov Disord.* 2005; 20:1286–98. PMID: [16001401](https://pubmed.ncbi.nlm.nih.gov/16001401/)
27. Kraus PH, Klotz P, Hoffmann A, Lewie J, Przuntek H. Analysis of the course of Parkinson's disease under dopaminergic therapy: performance of "fast tapping" is not a suitable parameter. *Mov Disord.* 2005; 20:348–54 PMID: [15584027](https://pubmed.ncbi.nlm.nih.gov/15584027/)
